# Supplementary material
Source: publisher figshare collection journal article supplement (https://tandf.figshare.com/articles/dataset/_/20764220)
Supplement: Supplementary file 1 [file 1]

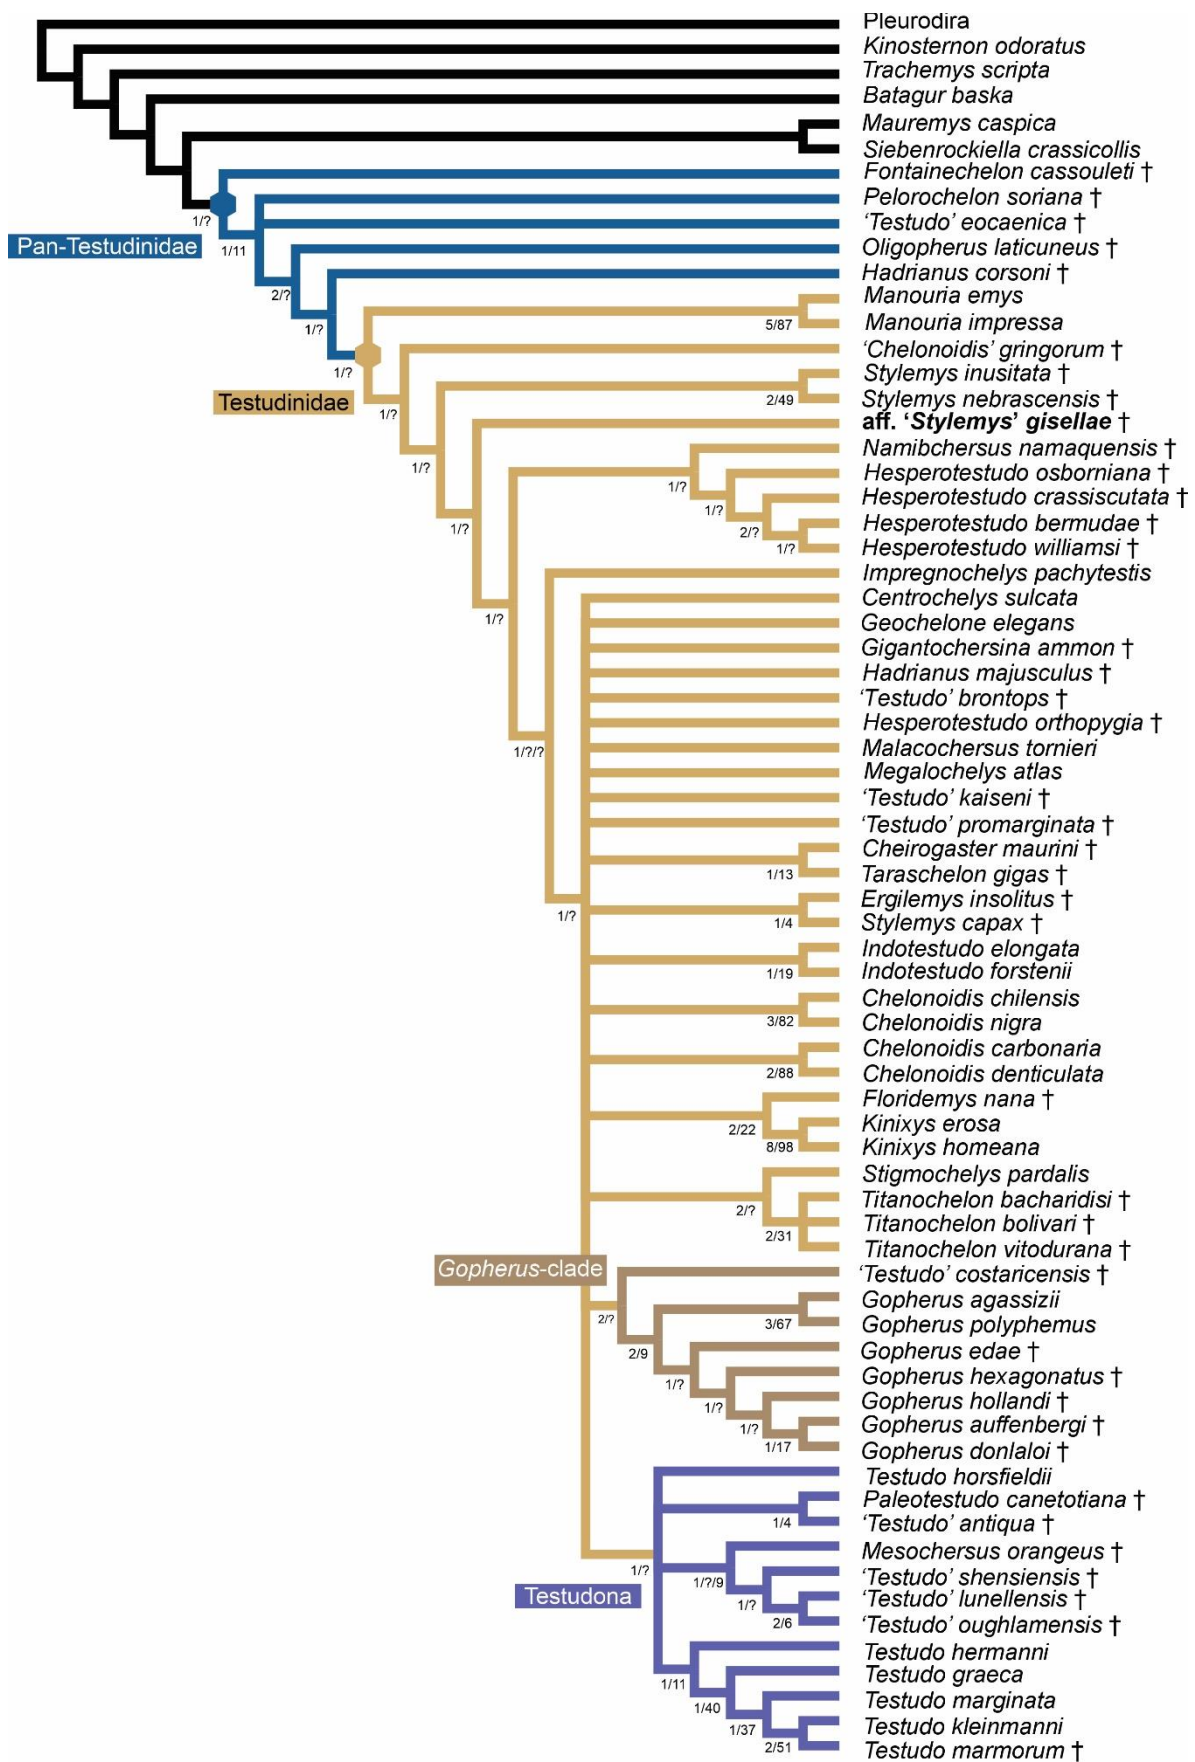

**Figure S1.** Standard Maximum Parsimony consensus tree (TL = 11463, CI = 0.380, RI = 0.329). aff. "*Stylemys*" *gisellae* sp. nov. in bold. Numbers below the lines indicate Bremer/bootstrap values. Extinct taxa are marked with a cross.
