# Supplementary material
Source: publisher figshare collection journal article supplement (https://tandf.figshare.com/articles/dataset/_/20764220)
Supplement: Supplementary file 2 [file 1]

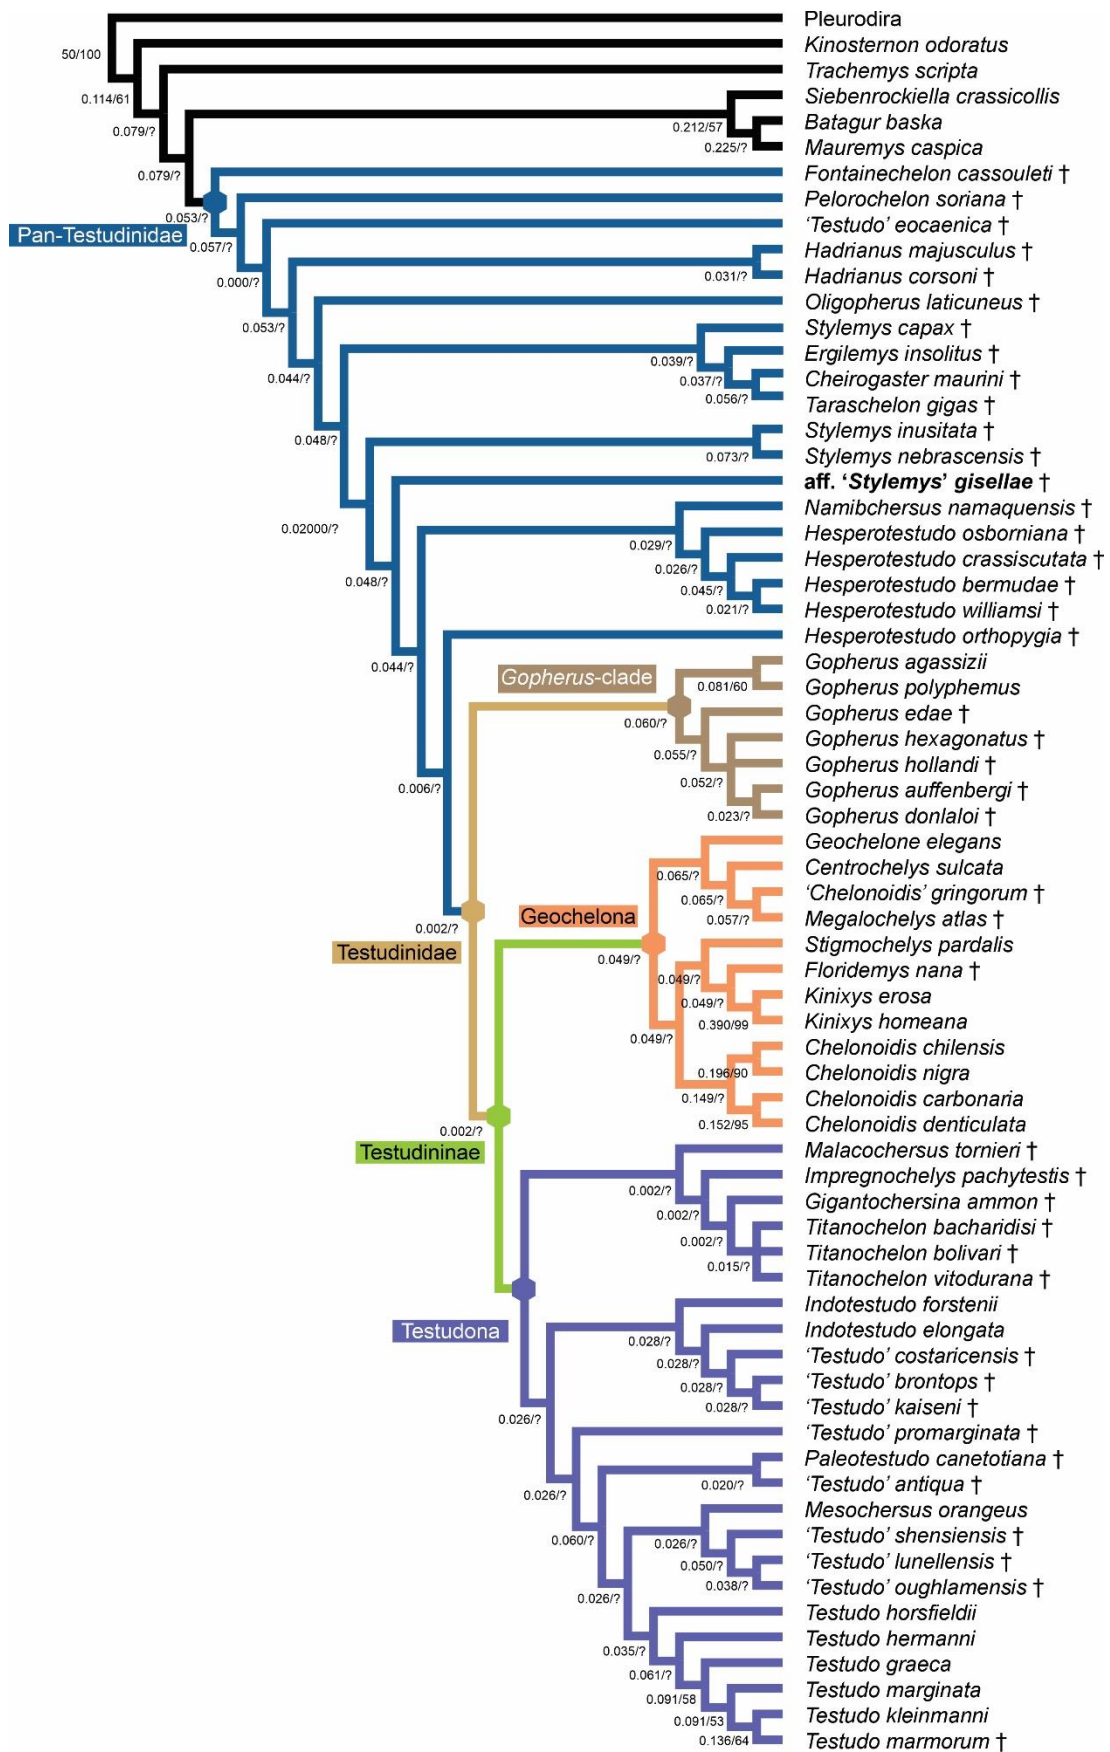

**Figure S2.** Consensus tree resulting from the Implied Weighted Maximum Parsimony analysis when *Manouria emys* and *M. impressa* are excluded (TL = 10688, CI = 0.350, RI = 0.178). *aff. "Stylemys" gisellae* sp. nov. in bold. Numbers below the lines indicate Bremer/bootstrap values. Extinct taxa are marked with a cross.
