# Supplementary material
Source: publisher figshare collection journal article supplement (https://tandf.figshare.com/articles/dataset/_/20764220)

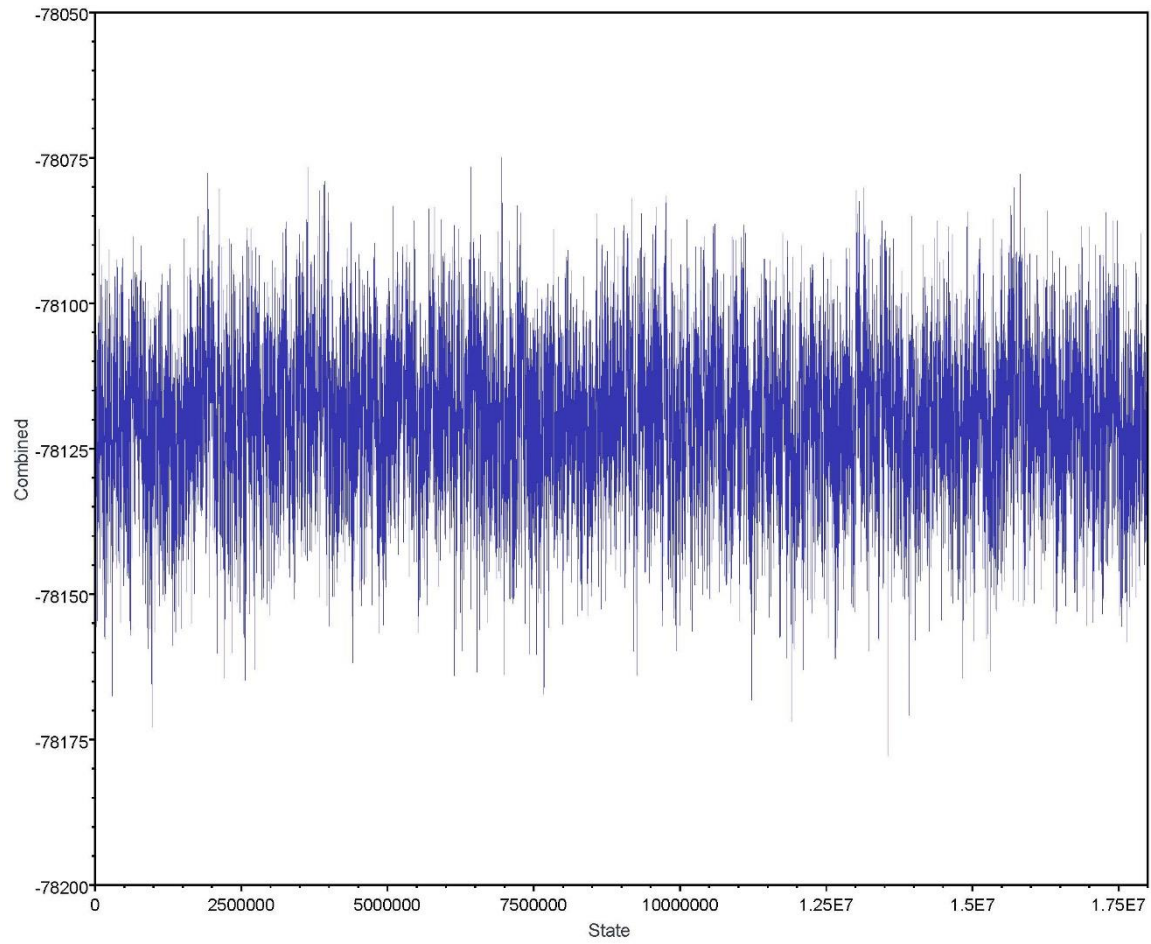

**Figure S3.** Trace plot for the log posterior probabilities of the analysis showing convergence.

Supplement: Supplementary file 3 [file 1]
